# Supplementary material for: Selective hydrogenolysis of glycerol to 1,3-propanediol over egg-shell type Ir–ReOx catalysts
Source: Royal Society of Chemistry journal article supplement (doi:10.1039/c5ra24808f), 2016-01-01
Supplement: c5ra24808f1.pdf [file c5ra24808f1.pdf]

## Supporting information

### Selectively hydrogenolysis of glycerol to 1,3-propanediol over egg-shell type Ir-ReO<sub>x</sub> catalysts

Wenting Luo,<sup>a, c</sup> Yuan Lyu,<sup>\*a</sup> Leifeng Gong,<sup>a</sup> Hong Du,<sup>a, c</sup> Tao, Wang,<sup>a, c</sup> Yunjie Ding<sup>\*a, b</sup>

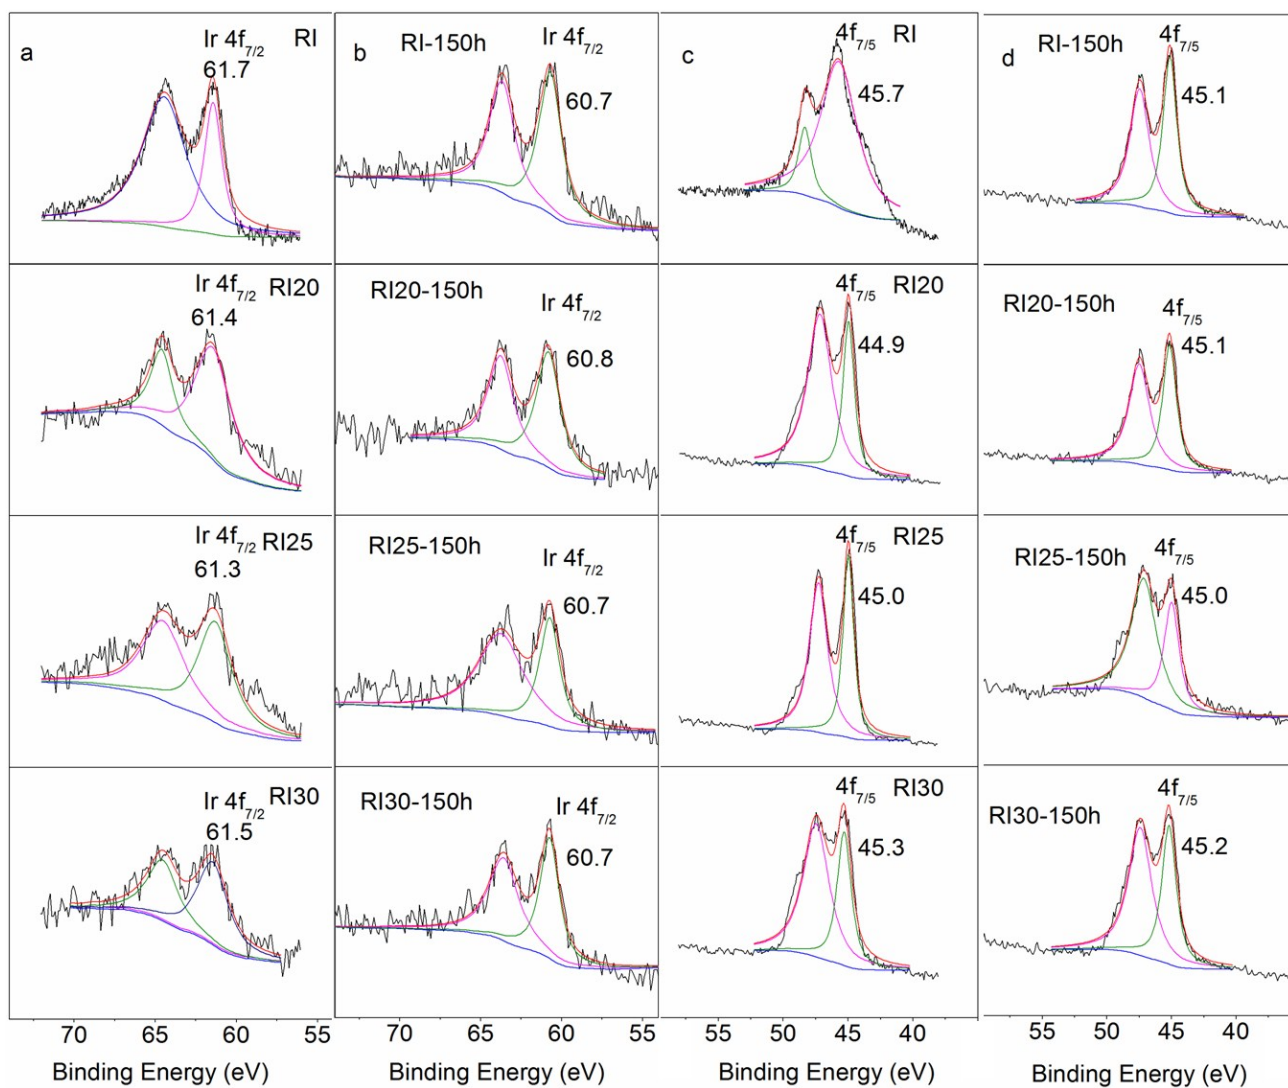

**Figure S1** Ir and Re 4f XPS spectra for the RI, RI20, RI25 and RI30 samples. (a) Ir before reaction. (b) Ir after reaction. (c) Re before reaction. (d) Re after reaction.
